# Supplementary material for: Transcriptomic Identification of Wheat AP2/ERF Transcription Factors and Functional Characterization of TaERF-6-3A in Response to Drought and Salinity Stresses
Source: MDPI journal article supplement (doi:10.3390/ijms23063272), 2022-03-18
Supplement: s1 [file s1]

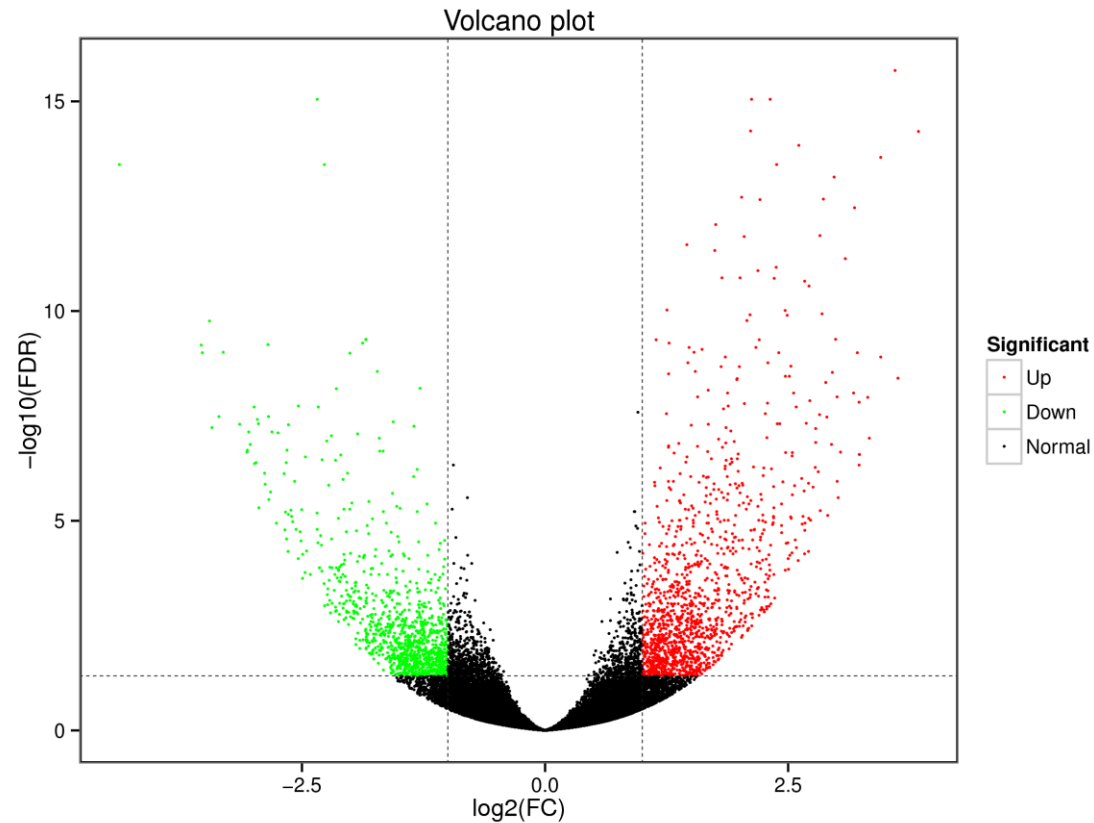

**Supplemental Figure S1. Volcano plot of differentially expressed genes.** Volcano plot represents the two vertical lines are the 2-fold change boundaries and the horizontal line is the statistical significance boundary ( $p < 0.05$ ). Genes with fold change  $\geq 2$  and statistical significance are marked with green and red dots.

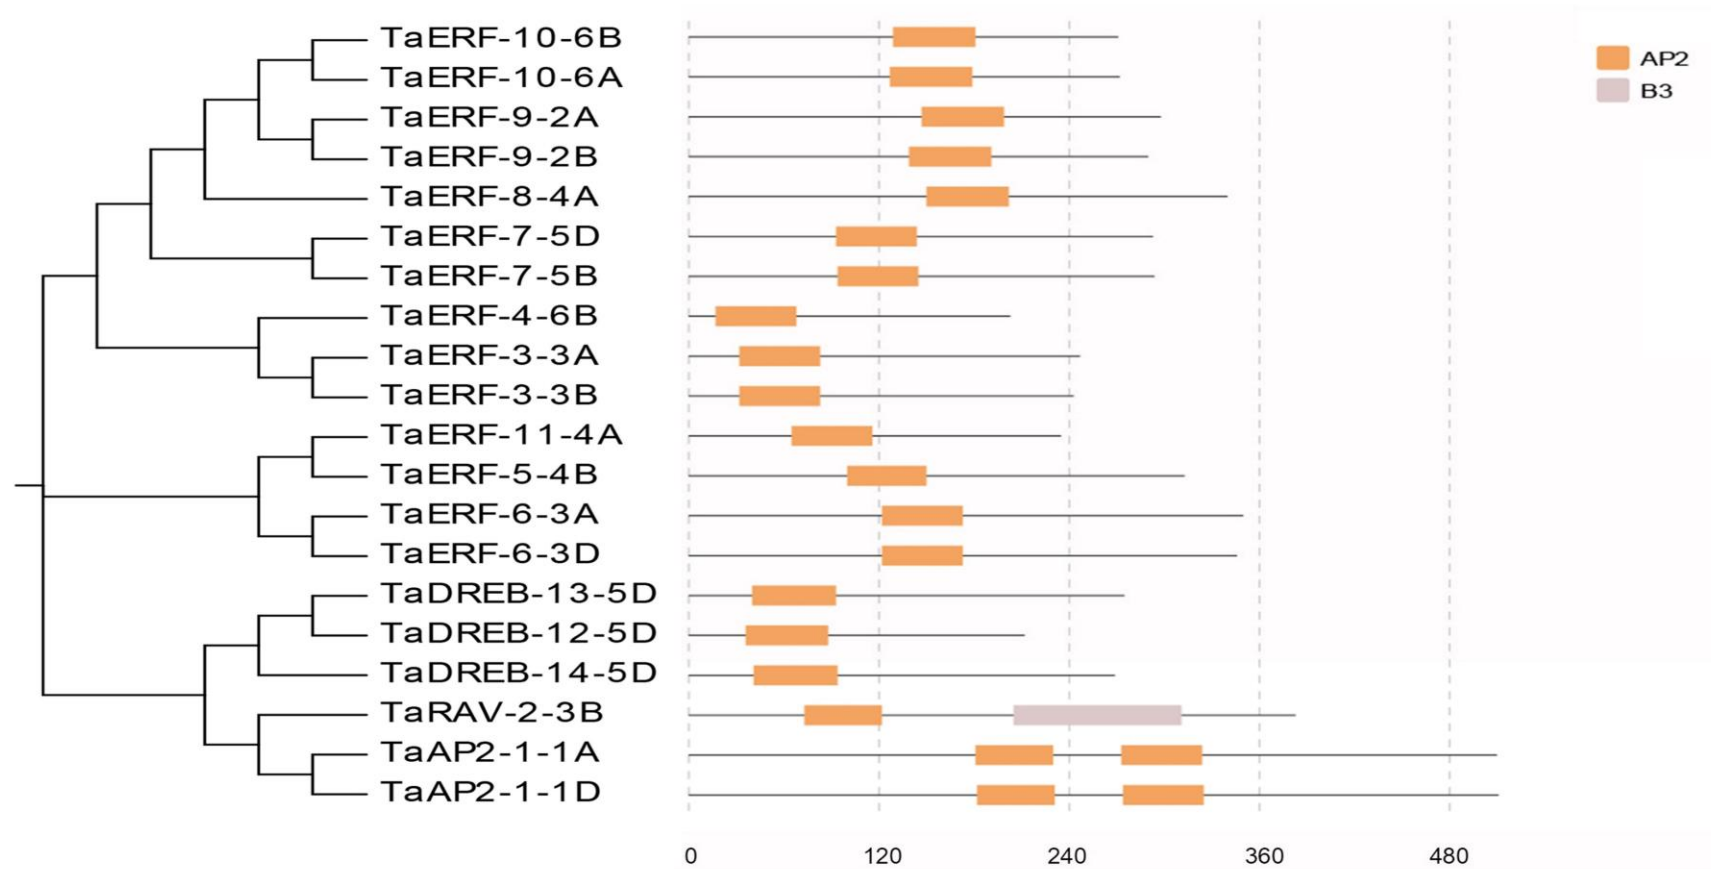

**Supplemental Figure S2. The domain analysis of AP2/ERF gene. The different color boxes presented AP2/B3 domain.**

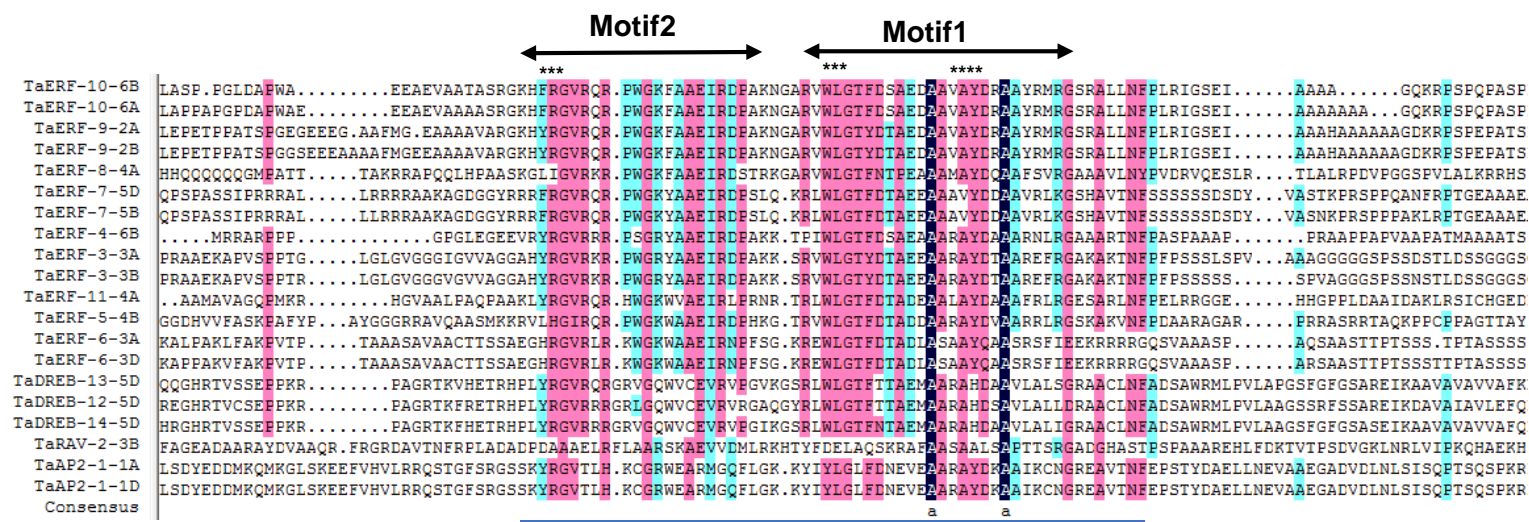

AP2-domain

Supplemental Figure S3. Protein sequence alignments of the AP2/ERF domain. The blue line and green box represent the AP2 domain and EAR sequence.



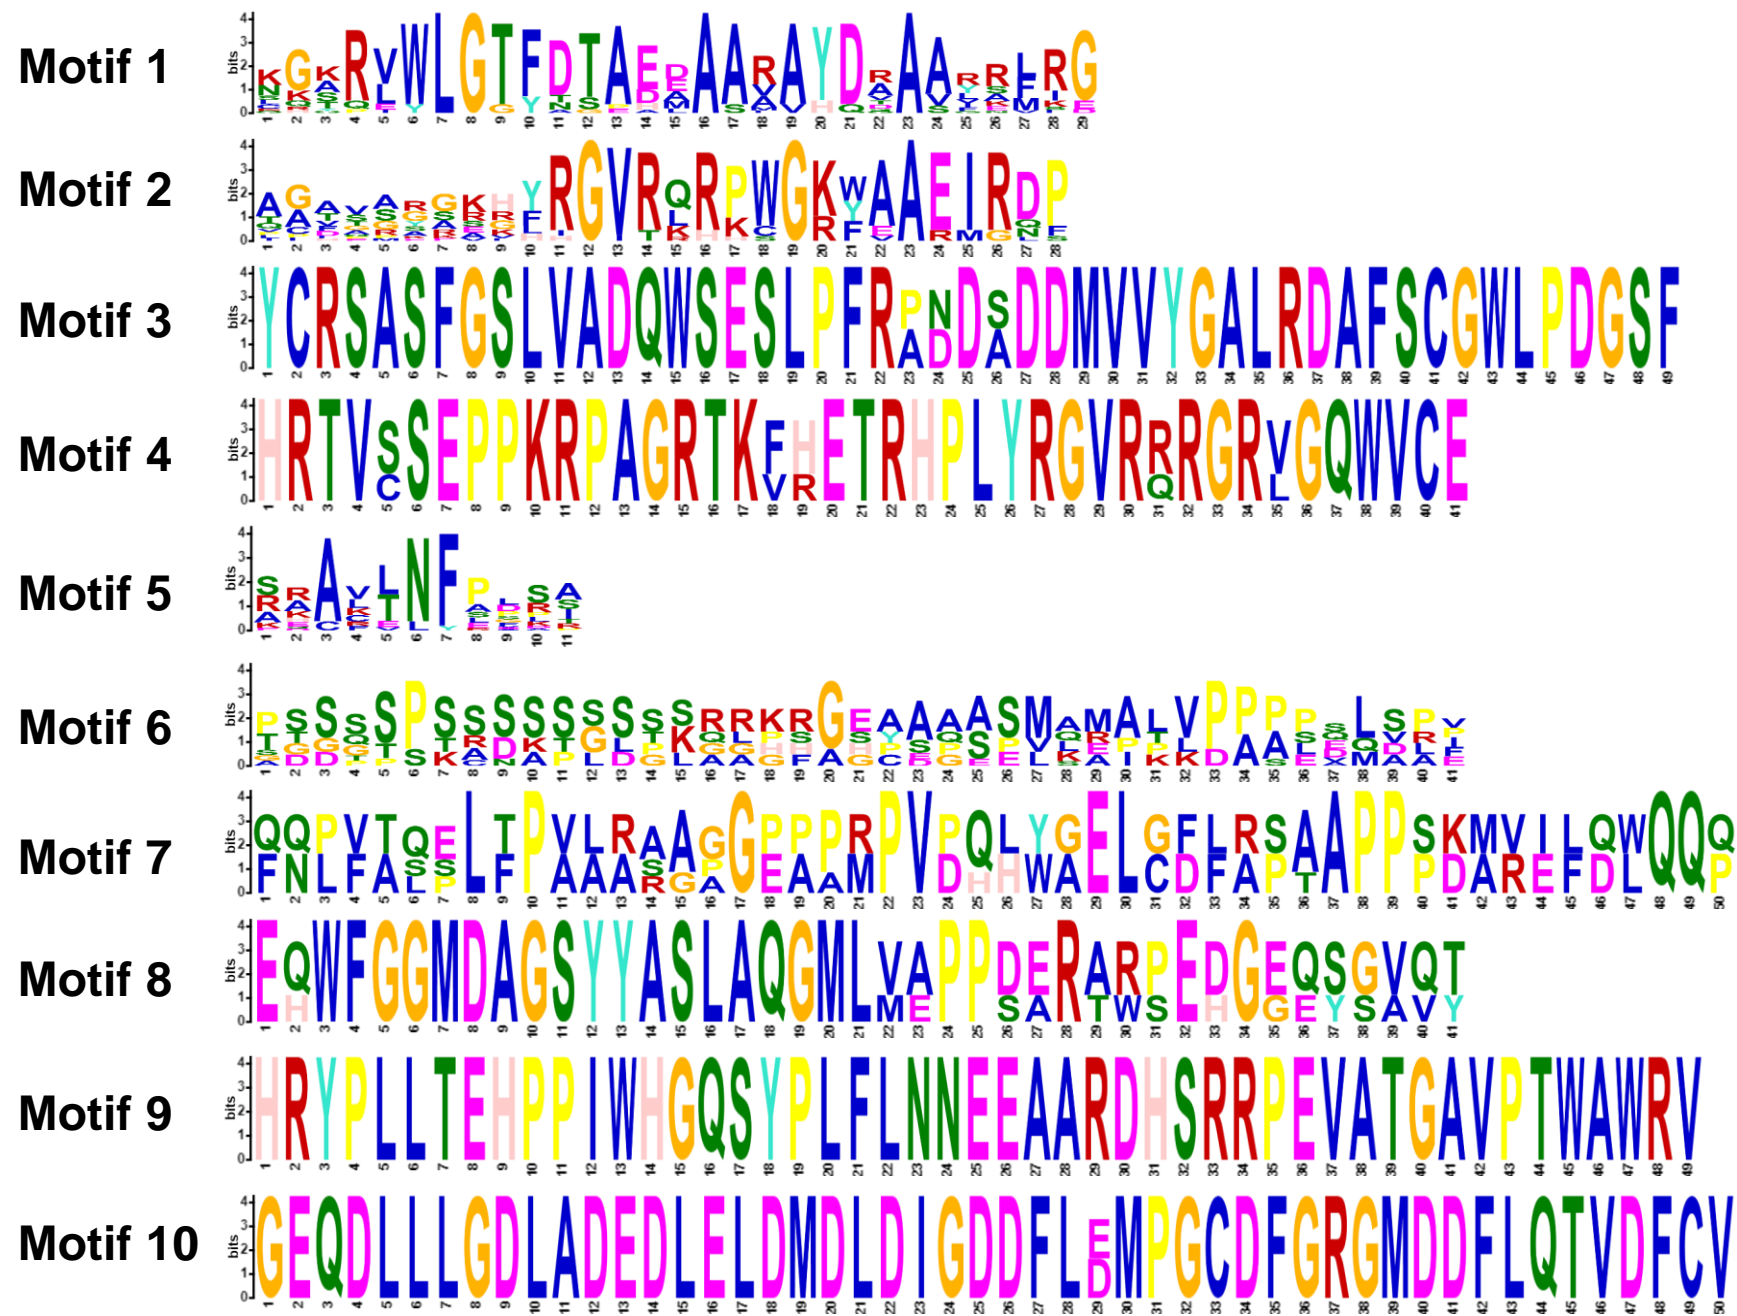

Supplemental Figure S5. Analysis and distribution of conserved motifs in wheat AP2/ERF proteins.
